# Supplementary material
Source: PubMed Central journal article supplement (PMC2366876)

## Supplementary Figure and Table

**Supplementary Figure 1** *VPS45*, *PCL1*, *CHC1*, *ERG3*, *KTR6*, and *GAS1* are not involved in Rsb1 expression induced by changes in lipid asymmetry. KCY662 (wild-type), KCY689 (*pdr5Δ*), KCY1139 (*vps45Δ*), KCY1119 (*pcl1Δ*), KCY1142 (*chc1Δ*), KCY1115 (*erg3Δ*), KCY1168 (*ktr6Δ*), and KCY1169 (*gas1Δ*) cells were grown in YPD medium. Proteins (1.25 μg) were treated with Endo H, separated by SDS-PAGE, then subjected to immunoblotting with an anti-HA antibody or an anti-Pgk1 antibody.

**TABLE1** Yeast strains used for Supplementary Figure

| Strain  | Genotype                                          | Source     |
|---------|---------------------------------------------------|------------|
| KCY1115 | SEY6210, <i>rsb1::RSB1-HA TRP1 erg3Δ::KanMX4</i>  | This study |
| KCY1119 | SEY6210, <i>rsb1::RSB1-HA TRP1 pcl1Δ::KanMX4</i>  | This study |
| KCY1139 | SEY6210, <i>rsb1::RSB1-HA TRP1 vps45Δ::KanMX4</i> | This study |
| KCY1142 | SEY6210, <i>rsb1::RSB1-HA TRP1 chc1Δ::KanMX4</i>  | This study |
| KCY1168 | SEY6210, <i>rsb1::RSB1-HA TRP1 ktr6Δ::KanMX4</i>  | This study |
| KCY1169 | SEY6210, <i>rsb1::RSB1-HA TRP1 gas1Δ::KanMX4</i>  | This study |

Supplementary Figure 1

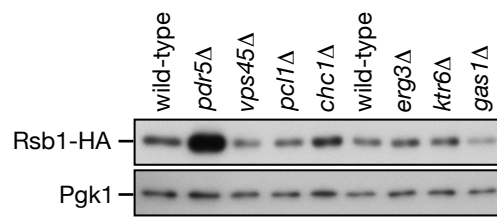

Supplement: mbc_E07-08-0806_1.pdf [file mbc_E07-08-0806_1.pdf]
